# Supplementary material for: Antioxidant, Anti-Inflammatory and Attenuating Intracellular Reactive Oxygen Species Activities of Nicotiana tabacum var. Virginia Leaf Extract Phytosomes and Shape Memory Gel Formulation
Source: MDPI journal article supplement (doi:10.3390/gels9020078), 2023-01-18
Supplement: s1 [file s1]

Article

# Antioxidant, Anti-Inflammatory and Attenuating Intracellular Reactive Oxygen Species Activities of *Nicotiana tabacum* var. Virginia Leaf Extract Phytosomes and Shape Memory Gel Formulation

Chuda Chittasupho, Kunyakorn Chaobankrang, Araya Sarawungkad, Weerasak Samee, Sudarshan Singh, Kirachuda Hemsuwimon, Siriporn Okonogi, Kantaporn Kheawfu, Kanokwan Kiattisin and Wantida Chaiyana

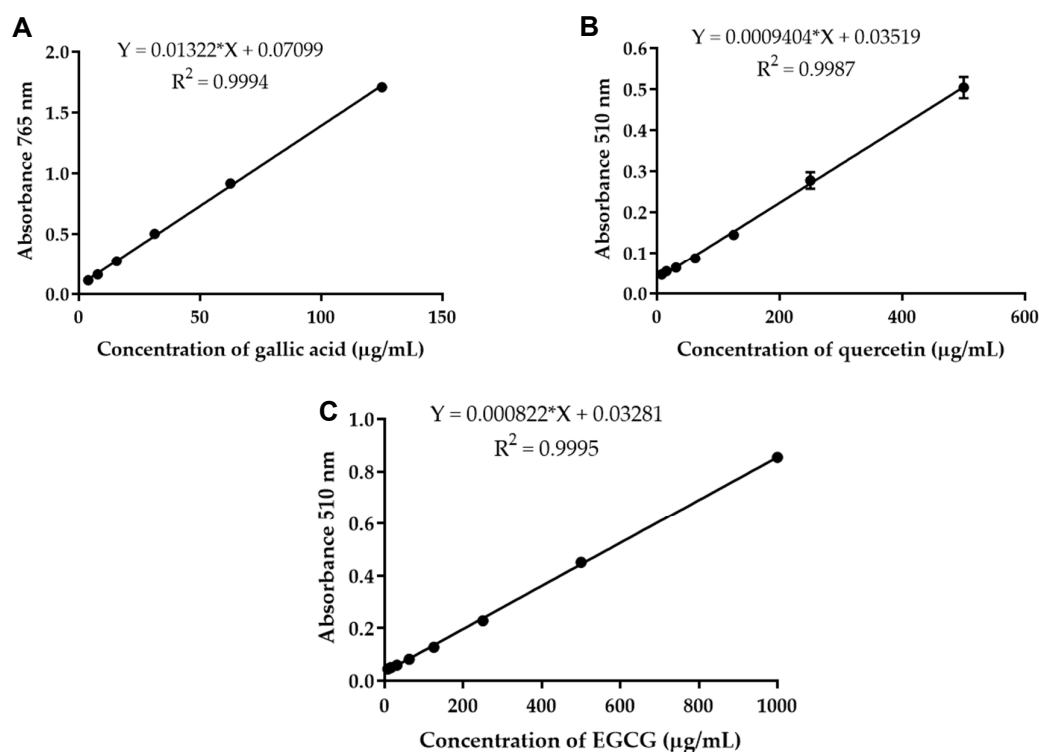

**Figure S1.** (A) Calibration curve of gallic acid (B) quercetin and (C) epigallocatechin (EGCG).

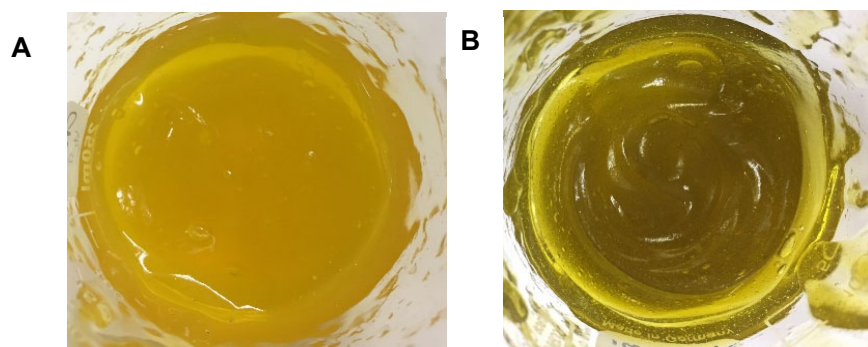

**Figure S2.** Appearance of shape memory gel containing 0.1% w/w of (A) VDL phytosomes and (B) VFL phytosomes.
